# Supplementary material for: Simultaneous electrochemical detection of catechol and hydroquinone based on gold nanoparticles@carbon nanocages modified electrode
Source: Royal Society of Chemistry journal article supplement (doi:10.1039/c5an01738f), 2015-01-01
Supplement: c5an01738f1.pdf [file c5an01738f1.pdf]

### Supporting Information

#### Simultaneous electrochemical detection of catechol and hydroquinone based on gold nanoparticles@carbon nanocages modified electrode

Fig. S1

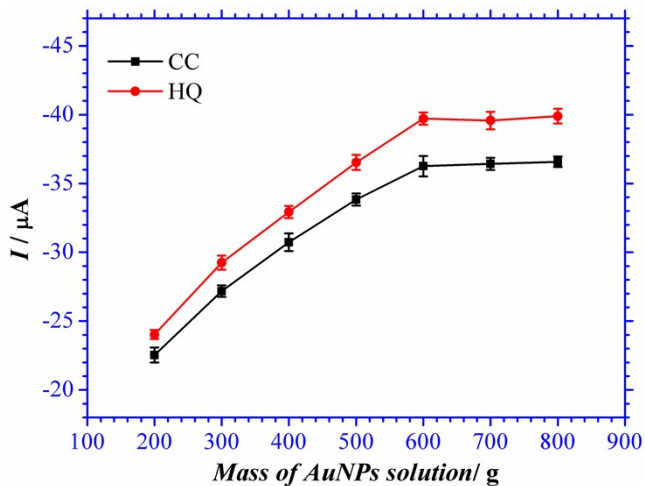

**Fig. S1** CV of oxidation current of CC and HQ for CNCs in different mass of AuNPs solution (200, 300, 400, 500, 600, 700 and 800 g).

Fig. S2

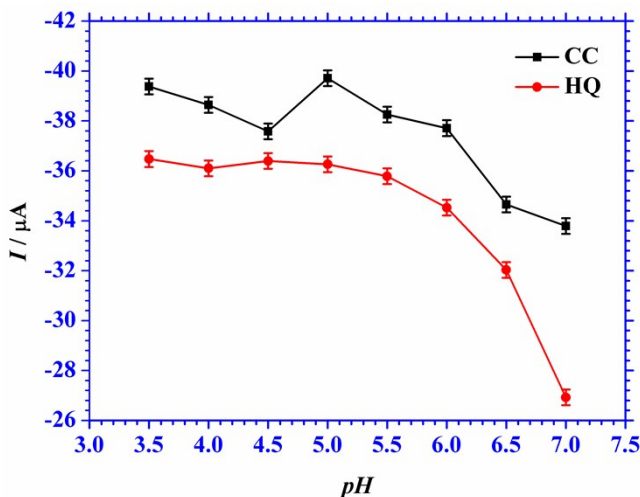

**Fig. S2** Effect of pH value on the anodic peak currents of CC and HQ at AuNPs@CNCs/GCE.

Fig. S3

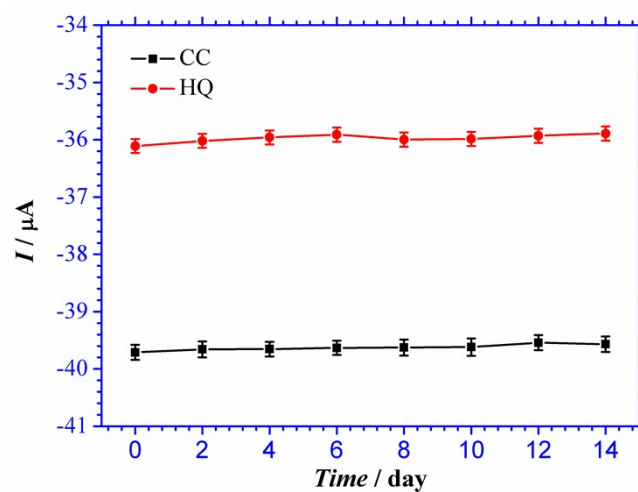

**Fig. S3** The stability of AuNPs@CNCs/GCE in 0.05 M HAc-NaAc solution with detection 50  $\mu\text{M}$  CC and HQ.
